# Supplementary material
Source: PubMed Central journal article supplement (PMC9678144)
Supplement: NIHMS1833845-supplement-Supplemental_Data_File__doc__pdf__etc__.pdf [file NIHMS1833845-supplement-Supplemental_Data_File__doc__pdf__etc__.pdf]

# Proteomes of Extracellular Vesicles From Pancreatic Cancer Cells and Cancer Associated Fibroblasts

## SUPPLEMENTAL DIGITAL CONTENT

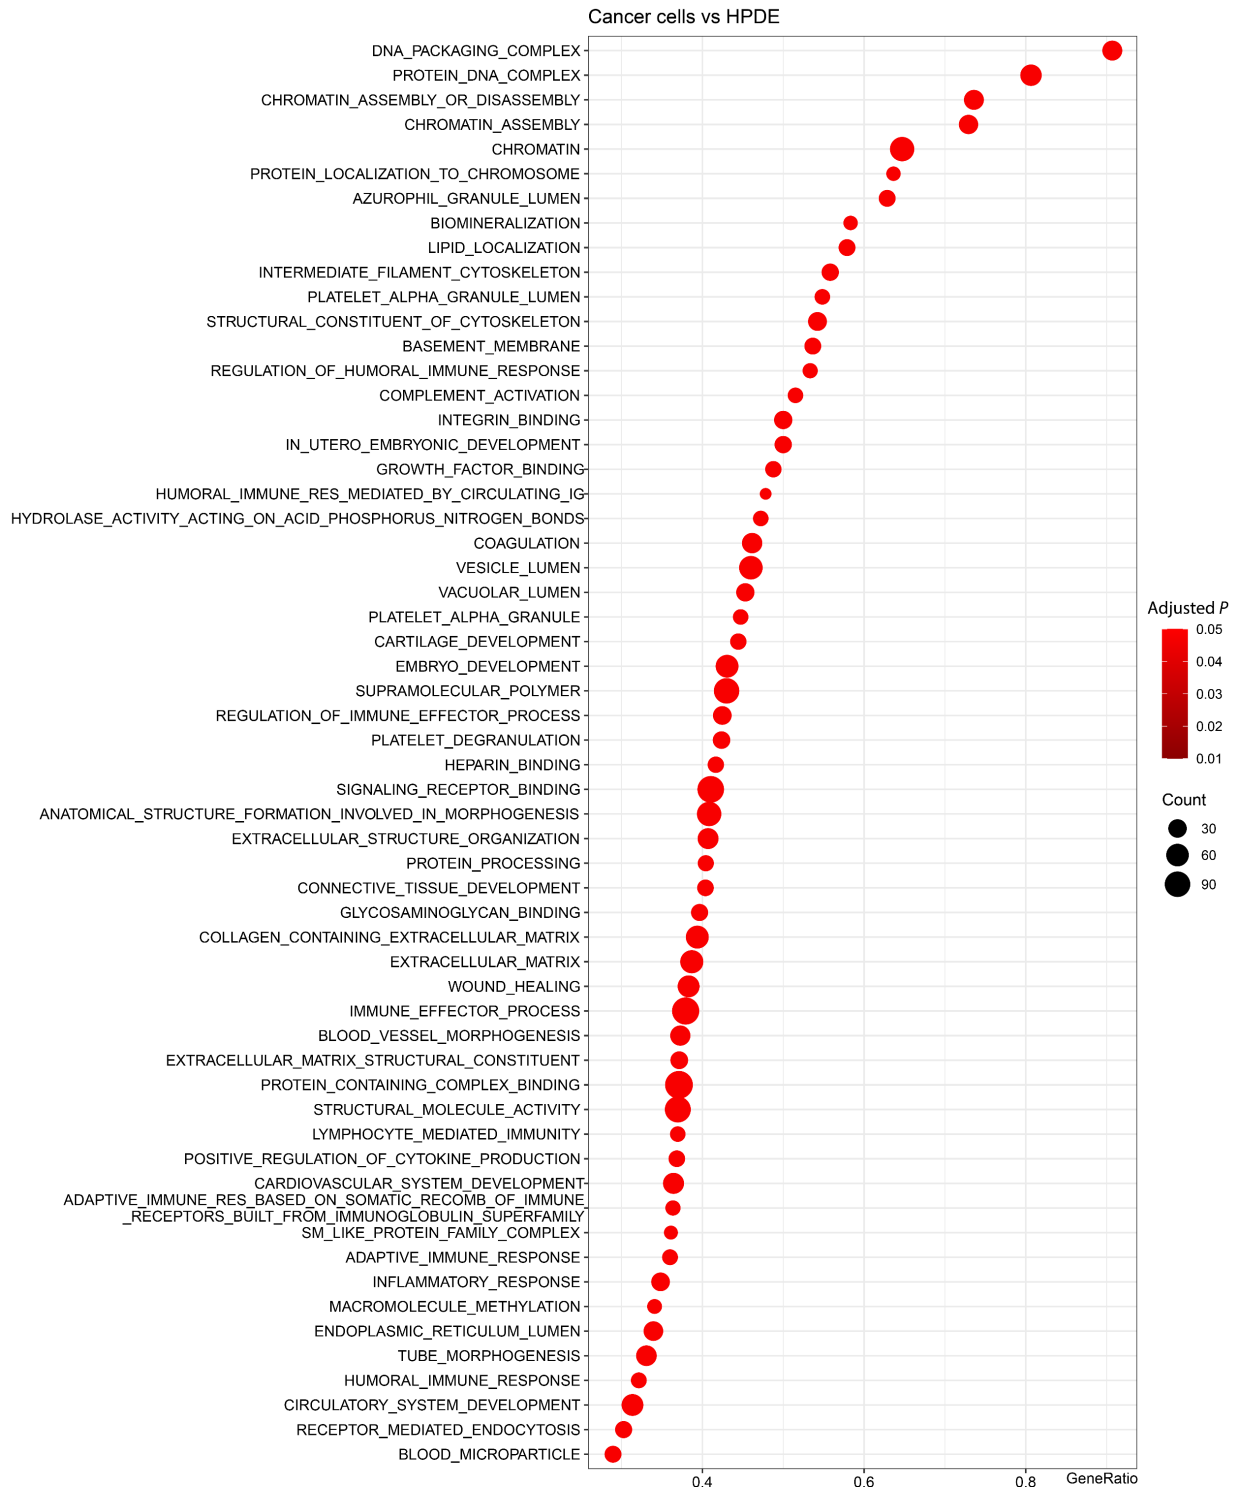

A

CAF cells vs HPDE

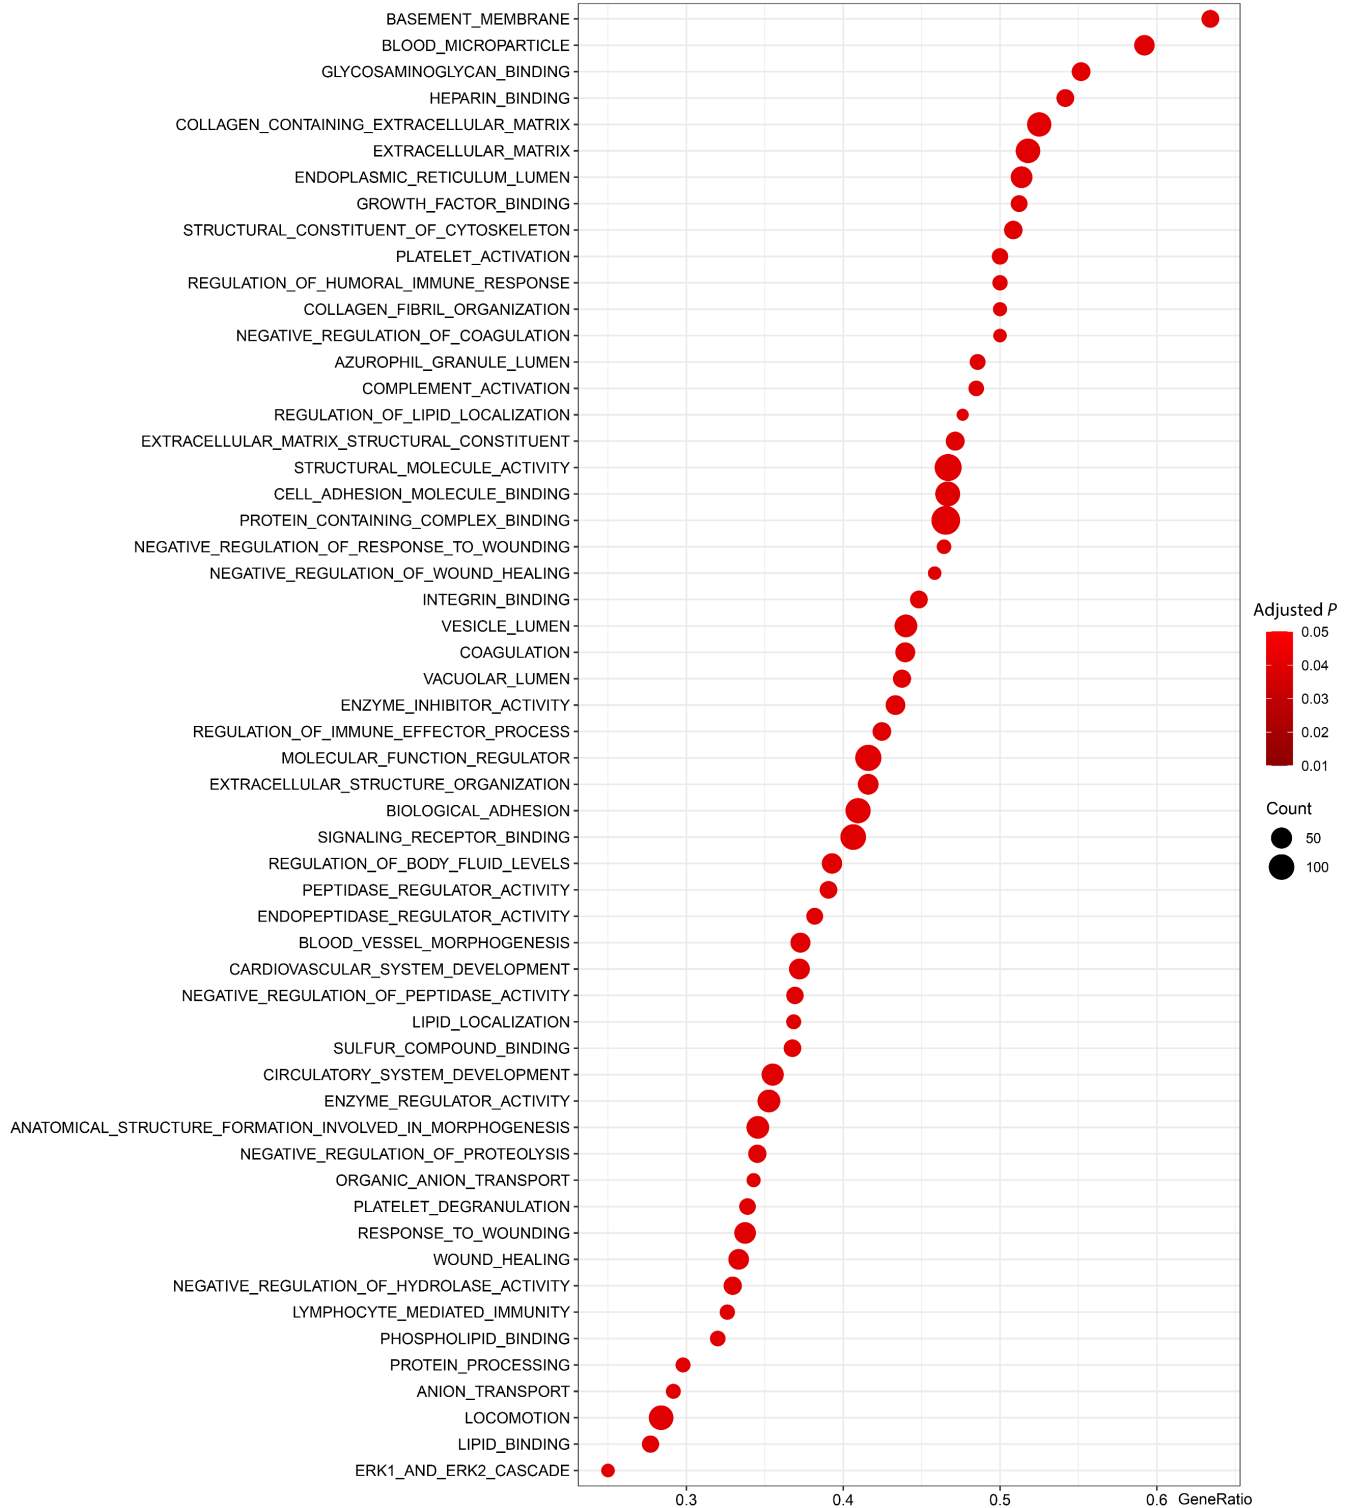

B

**SUPPLEMENTAL FIGURE 1.** Enrichment analysis using GSEA with biological processes comparing (A) PDAC cells versus HPDE and (B) CAF cells versus HPDE.
